# Supplementary material
Source: PubMed Central journal article supplement (PMC3783539)
Supplement: NIHMS494574-supplement-01.pdf [file NIHMS494574-supplement-01.pdf]

**Table S1.** Number of participants in each combined category of eGFR and ACR.

| eGFR (mL/min/1.73m <sup>2</sup> ) | ACR (mg/g)    |            |            |              |
|-----------------------------------|---------------|------------|------------|--------------|
|                                   | <30           | 30-299     | ≥ 300      | All          |
| ≥90                               | 3922 (35.5%)  | 266 (2.4%) | 51 (0.5%)  | 4239 (38.3%) |
| 60-89                             | 5680 (51.4%)  | 334 (3.0%) | 70 (0.6%)  | 6084 (55.0%) |
| 45-59                             | 471 (4.3%)    | 87 (0.8%)  | 24 (0.2%)  | 582 (5.3%)   |
| 30-44                             | 62 (0.6%)     | 29 (0.3%)  | 25 (0.2%)  | 116 (1.0%)   |
| <30                               | 5 (0.05%)     | 5 (0.05%)  | 29 (0.3%)  | 39 (0.4%)    |
| All                               | 10140 (91.7%) | 721 (6.5%) | 199 (1.8%) | 11060 (100%) |
