# Supplementary material
Source: PubMed Central journal article supplement (PMC3783539)
Supplement: NIHMS494574-supplement-06.pdf [file NIHMS494574-supplement-06.pdf]

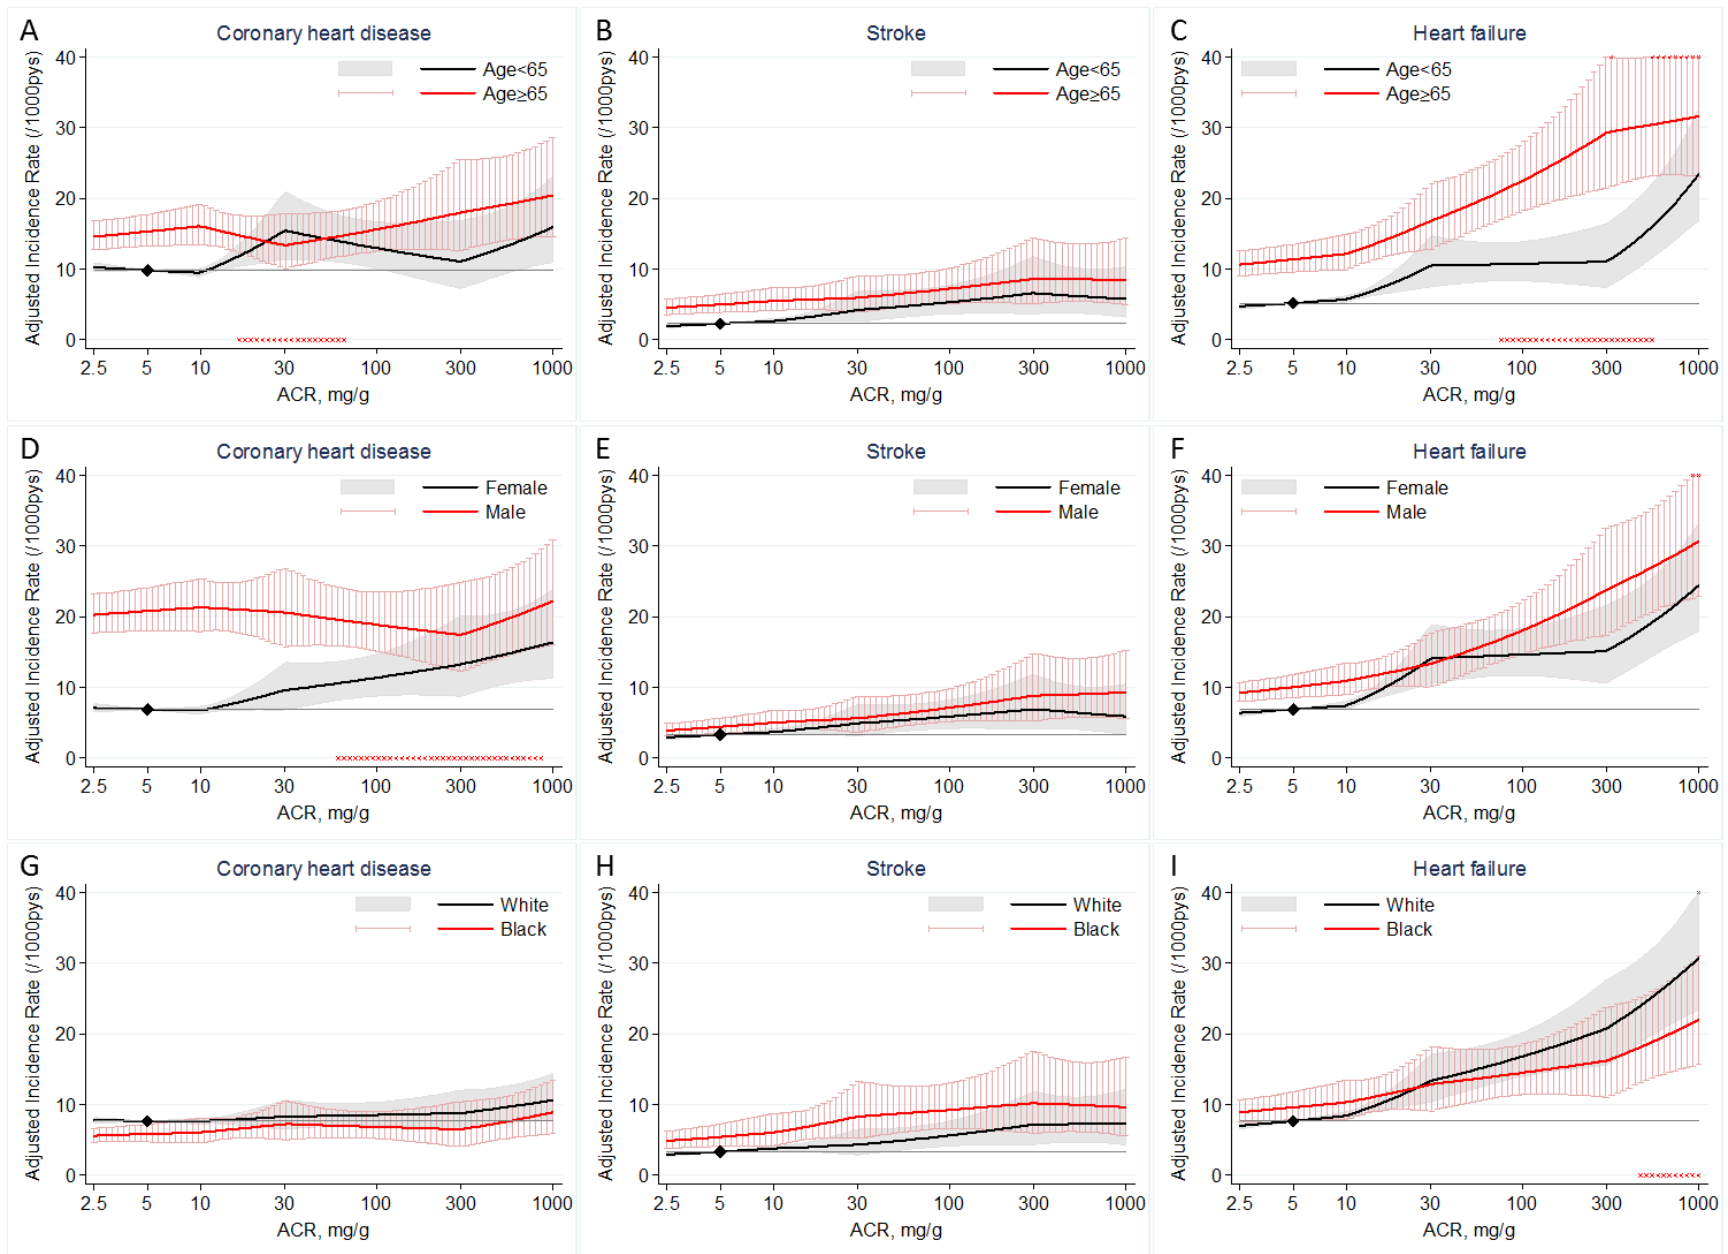

**Figure S5:** Adjusted incidence rates and 95% CIs (shaded areas or whisker plots) of coronary heart disease (left panels), stroke (middle panels), and heart failure (right panels) according to ACR with 5 mg/g as a reference (diamond) in the reference subgroup of age (A-C), sex (D-F), and race (G-I). Dots represent statistical significance ( $P < 0.05$ ). Stars at the bottom of each graph represent significant point-wise interactions ( $P < 0.05$ ) between two subgroups in additive scale. No stars indicate no significant point-wise interaction. Adjustments were for age, sex, race, smoking, history of cardiovascular disease, systolic blood pressure, diabetes, total cholesterol concentration, body mass index, and eGFR splines.
