# Supplementary material
Source: PubMed Central journal article supplement (PMC3783539)
Supplement: NIHMS494574-supplement-07.pdf [file NIHMS494574-supplement-07.pdf]

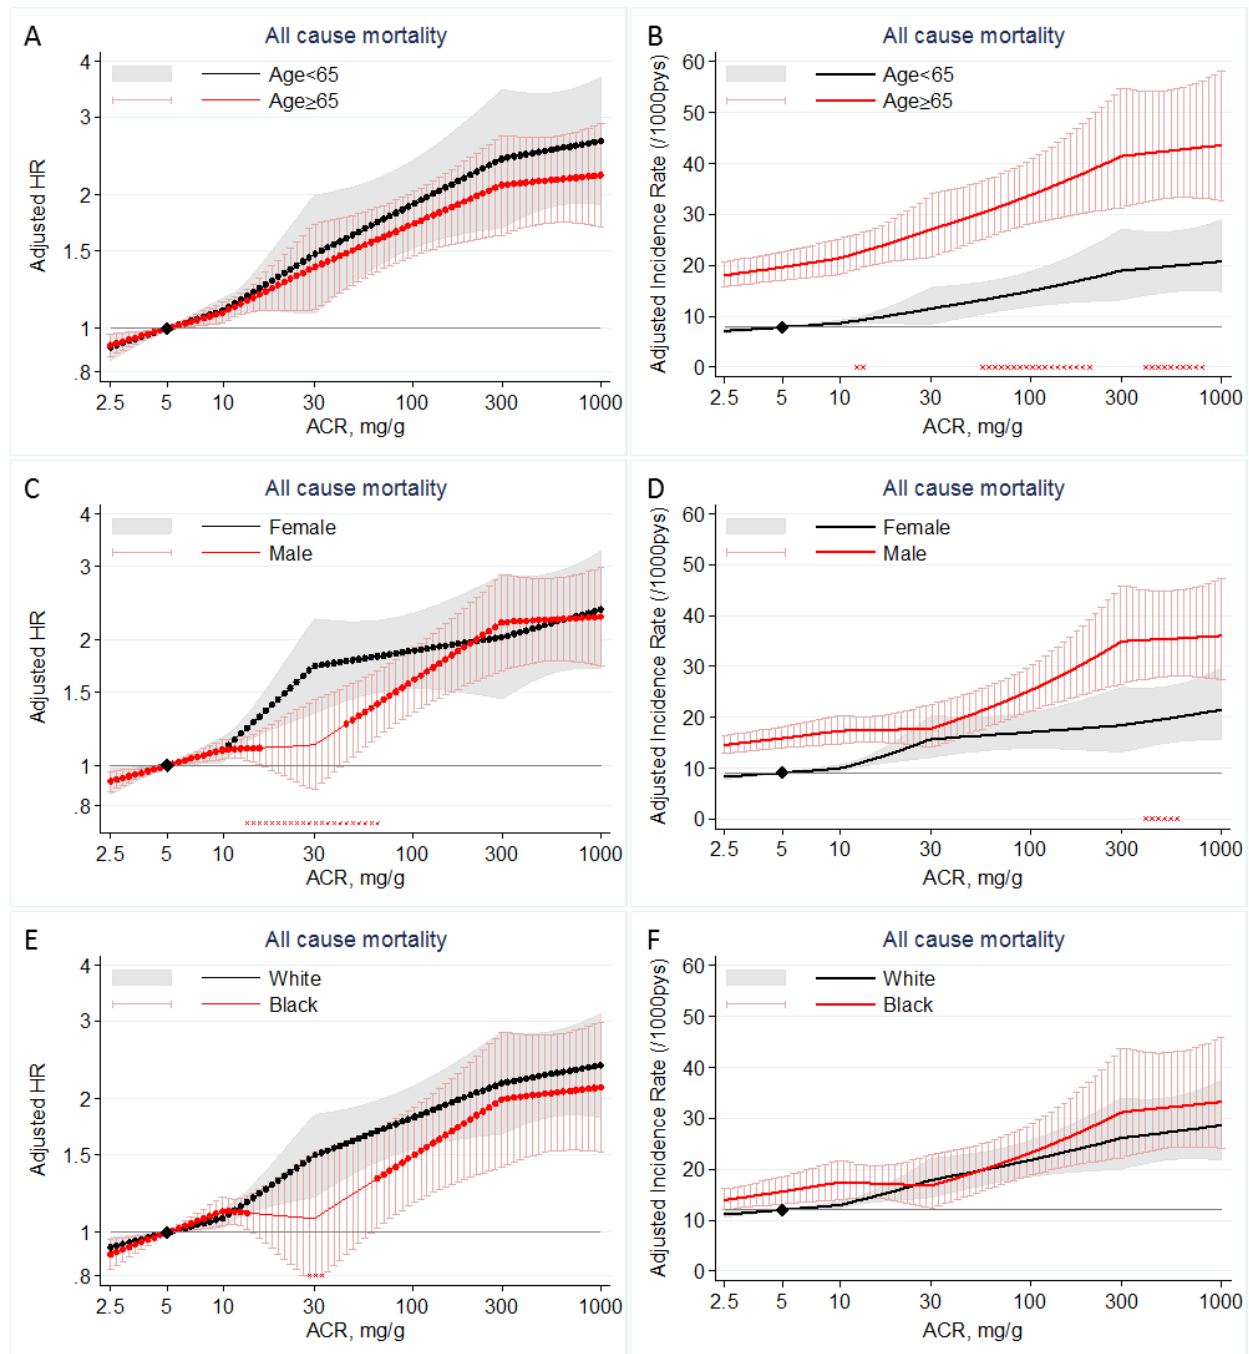

**Figure S6:** Adjusted hazard ratios and (left panels) and adjusted incidence rates (right panels) and 95% CIs (shaded areas or whisker plots) of all-cause mortality according to ACR with 5 mg/g as a reference (diamond) in each subgroup (right panels) and in the reference subgroup (right panels) for age (A-B), sex (C-D), and race (E-F). Dots represent statistical significance ( $P<0.05$ ). Stars at the bottom of each graph represent significant point-wise interactions ( $P<0.05$ ) between two subgroups in multiplicative (left panels) and additive (right panels) scale. No stars indicate no significant point-wise interaction. Adjustments were for age, sex, race, smoking, history of cardiovascular disease, systolic blood pressure, diabetes, total cholesterol concentration, body mass index, and eGFR splines.
